# Supplementary material
Source: PubMed Central journal article supplement (PMC6764902)

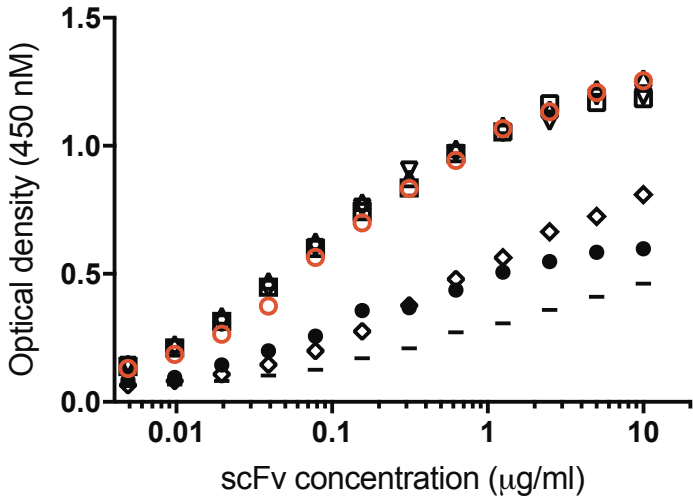

- scFv-GC132a
- scFv-GC132b
- △ scFv-GC132c
- ▽ scFv-GC132d
- ◇ scFv-GC132e
- scFv-GC132f
- scFv-GC132

Supplement: NIHMS1526705-supplement-1.pdf [file NIHMS1526705-supplement-1.pdf]

(a)

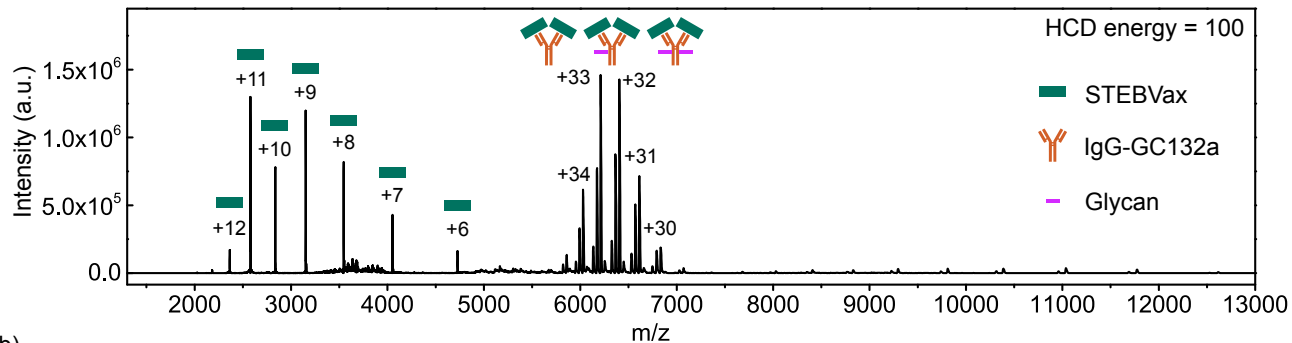

(b)

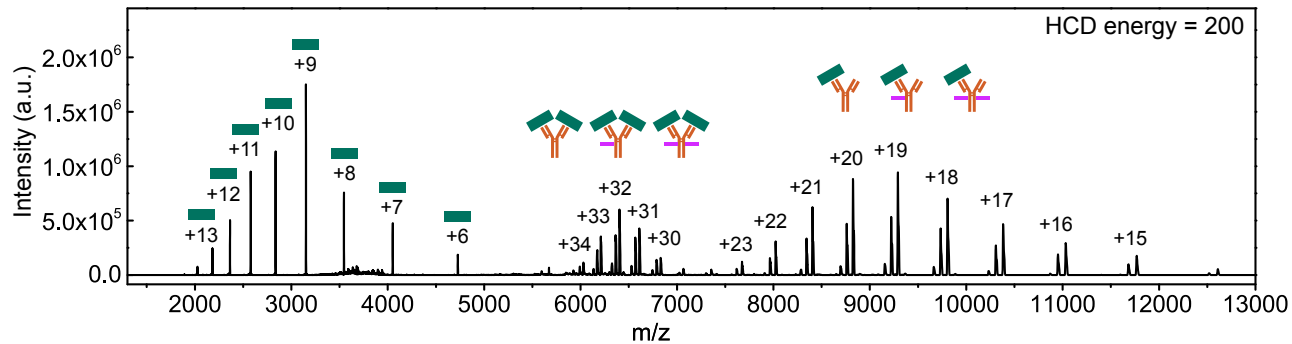

Supplement: NIHMS1526705-supplement-2.pdf [file NIHMS1526705-supplement-2.pdf]

(a)

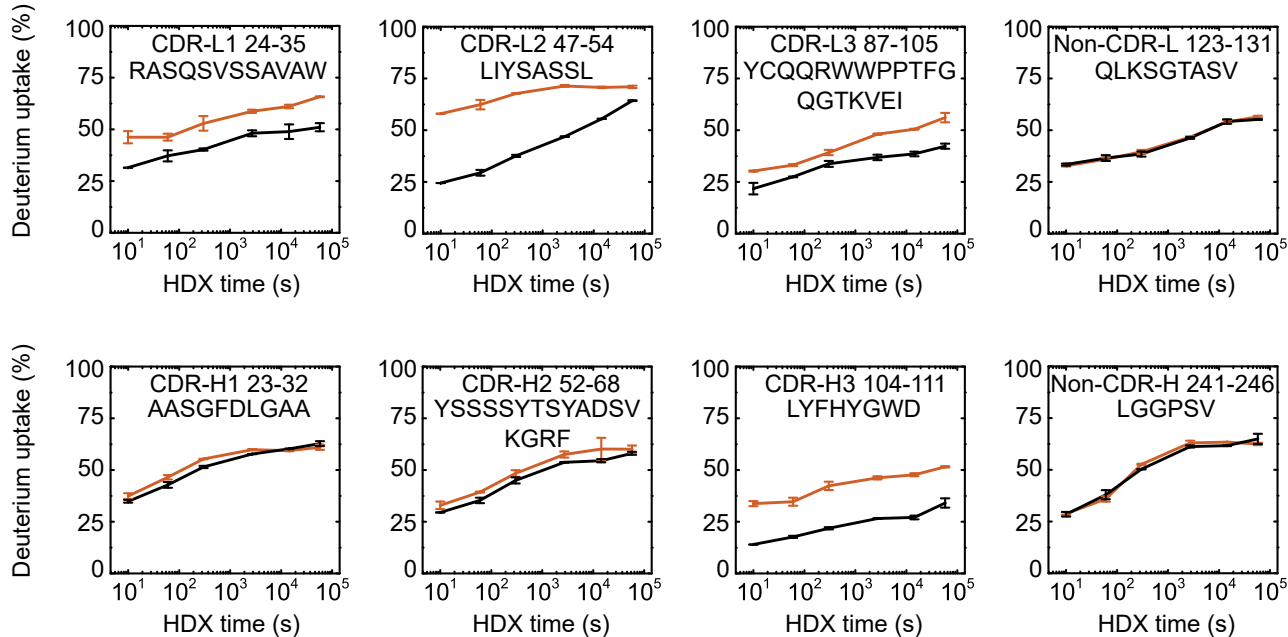

(b)

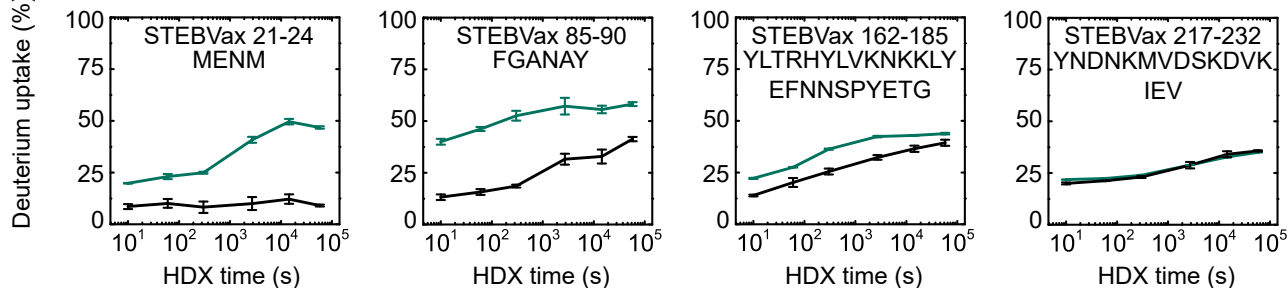

Supplement: NIHMS1526705-supplement-3.pdf [file NIHMS1526705-supplement-3.pdf]
